# Supplementary material
Source: PubMed Central journal article supplement (PMC3768167)
Supplement: NIHMS256795-supplement-01.pdf [file NIHMS256795-supplement-01.pdf]

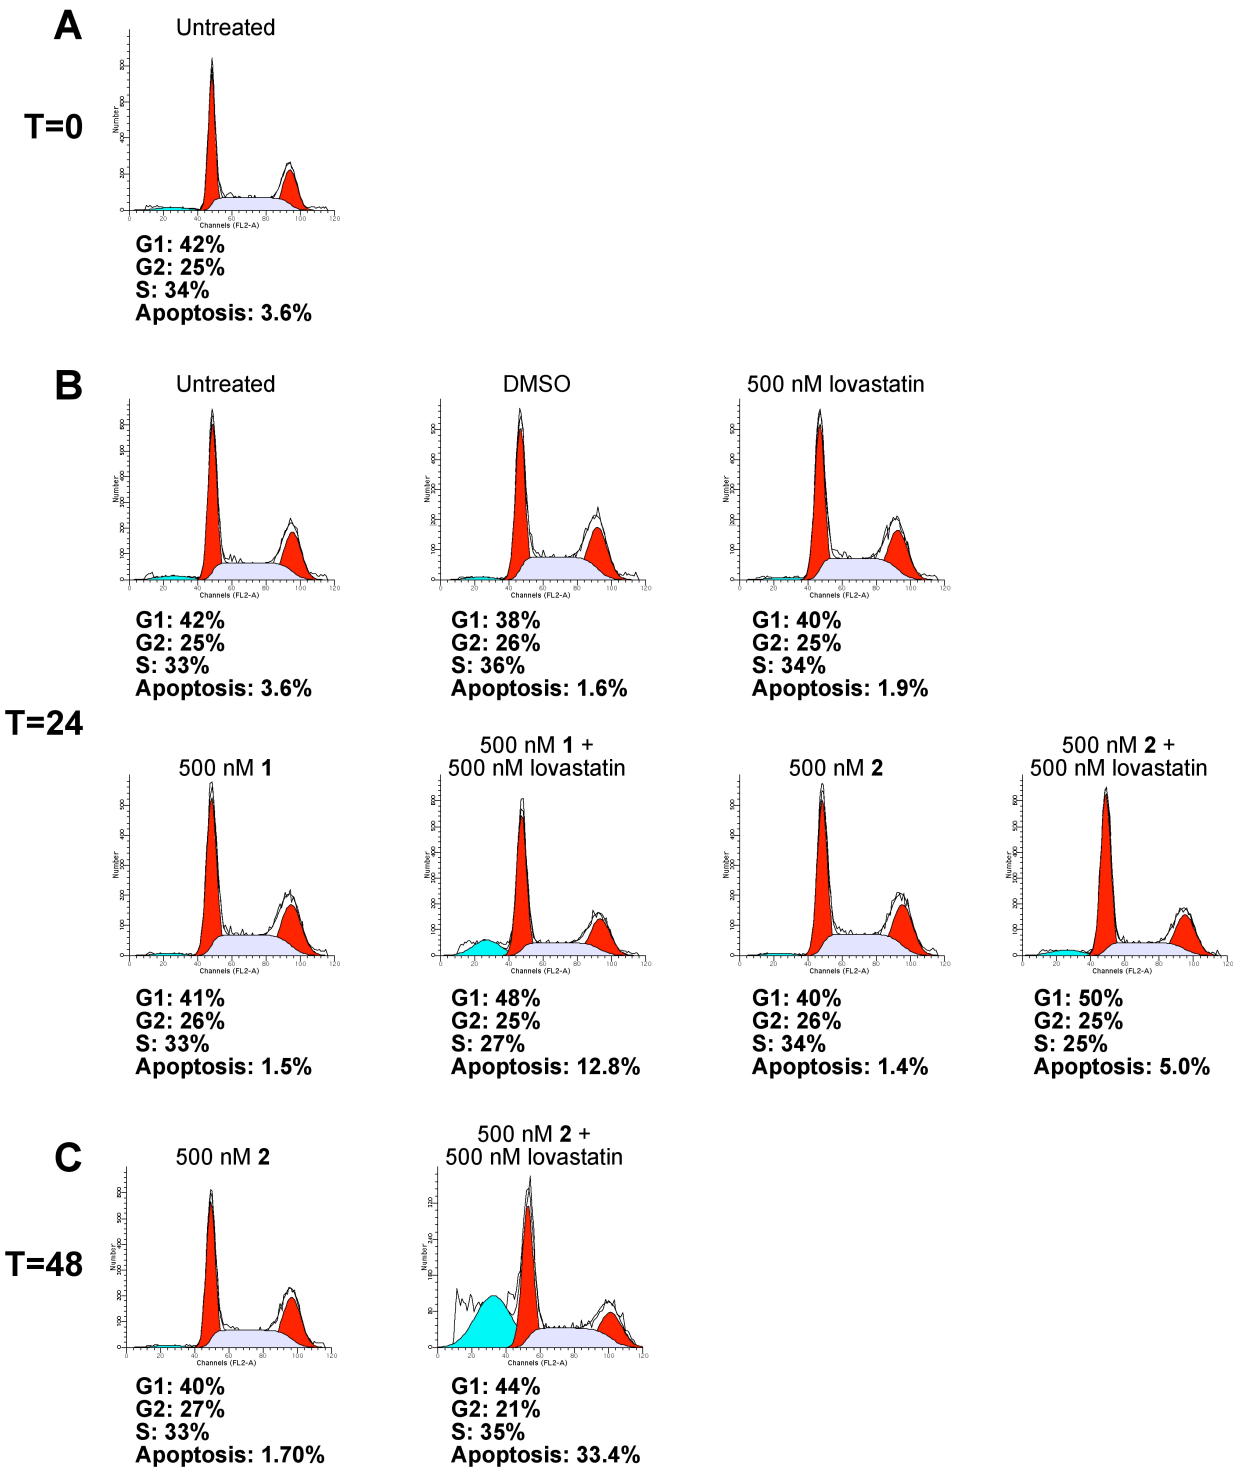

**Supplemental Figure 1:** NF90-8 cells were grown in 5% FBS and treated 24 hours following initial seeding. Cells were treated as indicated in the figure for 24 and 48

hours prior to harvesting and processing for FACS analysis of DNA content. Cell cycle analysis was determined using flow cytometry for DNA content stained with propidium iodide. Histograms represent  $10^4$  events, and the cell cycle profile was determined using MODFIT. 500 nM **1** or **2** in combination with 500 nM lovastatin increased the number of cells in G<sub>1</sub> and greatly increased the presence of cells with sub-G<sub>1</sub> DNA content. Data are a representation of three independent experiments.

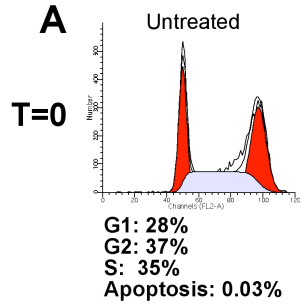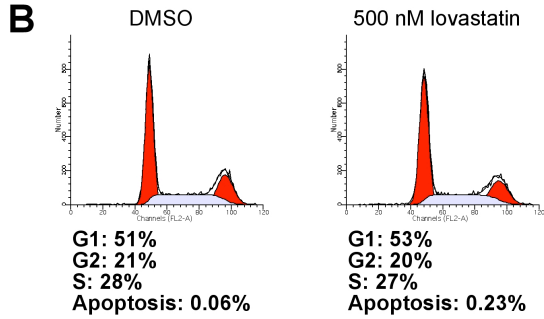

**T=24**

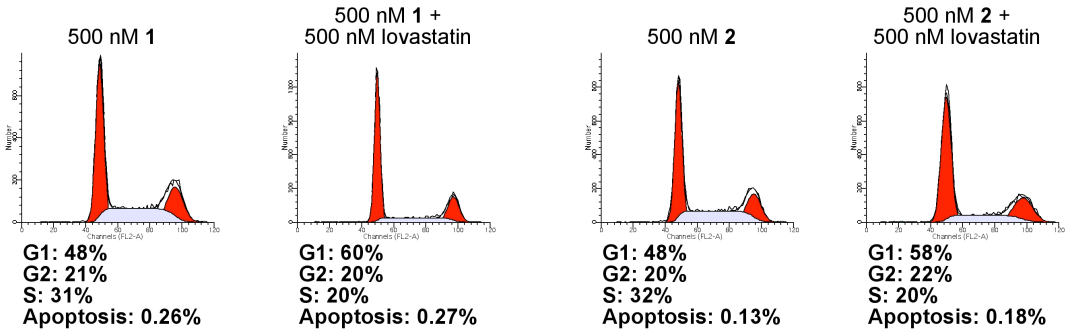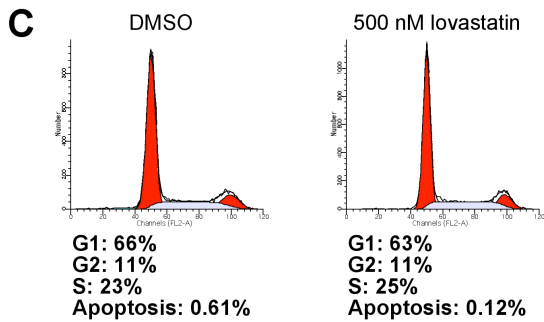

**T=48**

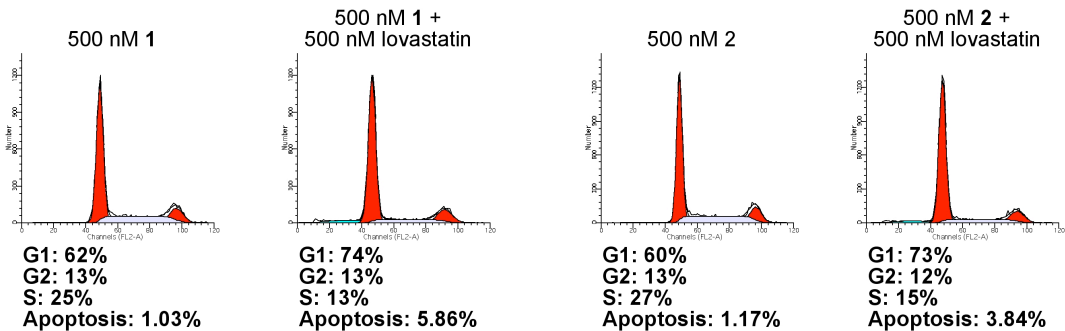

**Supplemental Figure 2:** ST88-14 cells were grown in 5% FBS and treated 24 hours following initial seeding. Cells were treated as indicated in the figure for 24 and 48 hours prior to harvesting and processing for FACS analysis of DNA content. Cell cycle analysis was determined using flow cytometry for DNA content stained with propidium iodide. Histograms represent  $10^4$  events, and the cell cycle profile was determined using MODFIT. 500 nM **1** or **2** in combination with 500 nM lovastatin increased the number of cells in G<sub>1</sub> and greatly increased the presence of cells with sub-G<sub>1</sub> DNA content. Data are a representation of three independent experiments.
